# Supplementary material for: A visible light-triggered artificial photonic nociceptor with adaptive tunability of threshold
Source: Royal Society of Chemistry journal article supplement (doi:10.1039/d0nr07297d), 2020-12-10

## **Supplementary Information to “A visible light-triggered artificial photonic nociceptor with adaptive tunability of threshold”**

Guodong Gong,<sup>a,b,c</sup> Shuang Gao,<sup>\*a,b</sup> Zhuolin Xie,<sup>a,b,c</sup> Xiaoyu Ye,<sup>a,b,c</sup> Ying Lu,<sup>a,b,c</sup> Huali Yang,<sup>a,b</sup>  
Xiaojian Zhu,<sup>a,b</sup> and Run-Wei Li<sup>\*a,b</sup>

*<sup>a</sup>CAS Key Laboratory of Magnetic Materials and Devices, Ningbo Institute of Materials Technology and Engineering, Chinese Academy of Sciences, Ningbo 315201, P. R. China. E-mail: gaoshuang@nimte.ac.cn, runweili@nimte.ac.cn*

*<sup>b</sup>Zhejiang Province Key Laboratory of Magnetic Materials and Application Technology, Ningbo Institute of Materials Technology and Engineering, Chinese Academy of Sciences, Ningbo 315201, P. R. China*

*<sup>c</sup>College of Materials Science and Opto-Electronic Technology, University of Chinese Academy of Sciences, Beijing 100049, P. R. China*

**Fig. S1** XRD spectrum of the  $\text{CeO}_{2-x}$  thin film deposited on a glass substrate.

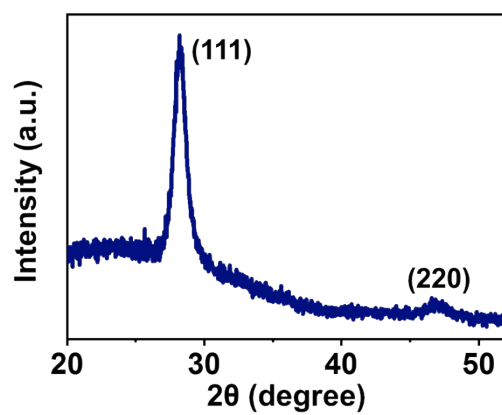

**Fig. S2** Surface morphology of the  $\text{CeO}_{2-x}$  thin film.

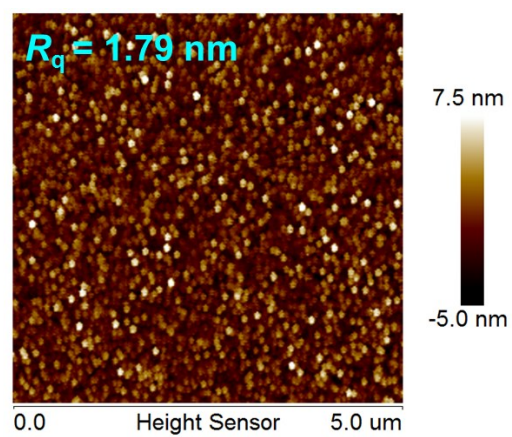

**Fig. S3** Photocurrent response of the device under different read voltages but a fixed green optical intensity of  $90 \text{ pW}/\mu\text{m}^2$ . The inset shows the magnified current relaxation processes after removal of the optical irradiation.

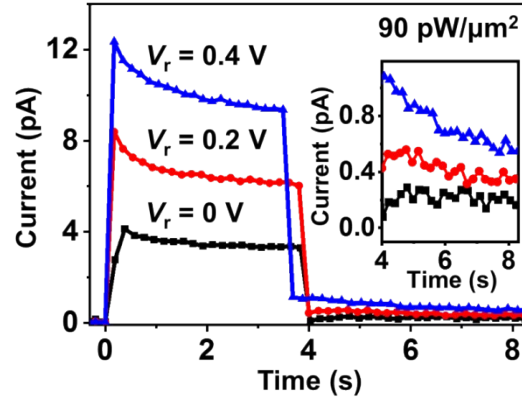

**Fig. S4** Photocurrent response of the device to multiple green optical pulses with the intensities of 5 (a) and 11 (b)  $\text{pW}/\mu\text{m}^2$ . Pulse width, 0.2 s.

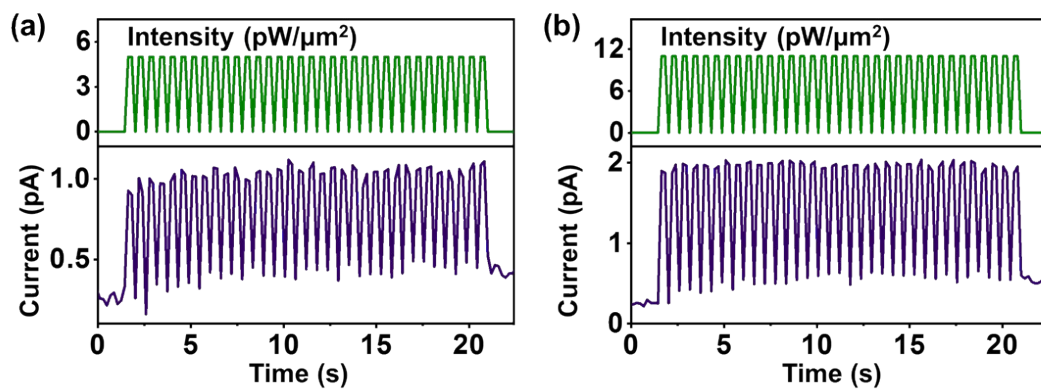

**Fig. S5** Schematic mechanism for the relaxation process of the device. After the removal of optical irradiation, the re-trapped free electrons can be gradually detrapped from the shallow oxygen vacancies due to metastability, thus generating a notable relaxation current.

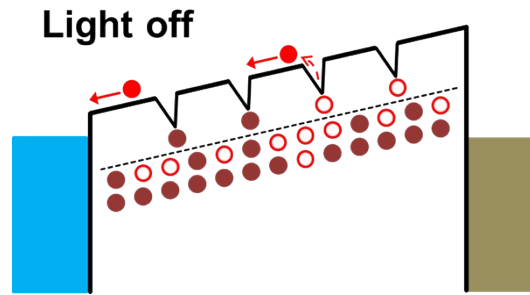

**Fig. S6** Raw data for demonstrating the allodynia and hyperalgesia characteristics in Fig. 4d. (a-f)

The damaging illumination intensity is  $110 \text{ pW}/\mu\text{m}^2$ . (g-j) The damaging illumination intensity is

$130 \text{ pW}/\mu\text{m}^2$ .

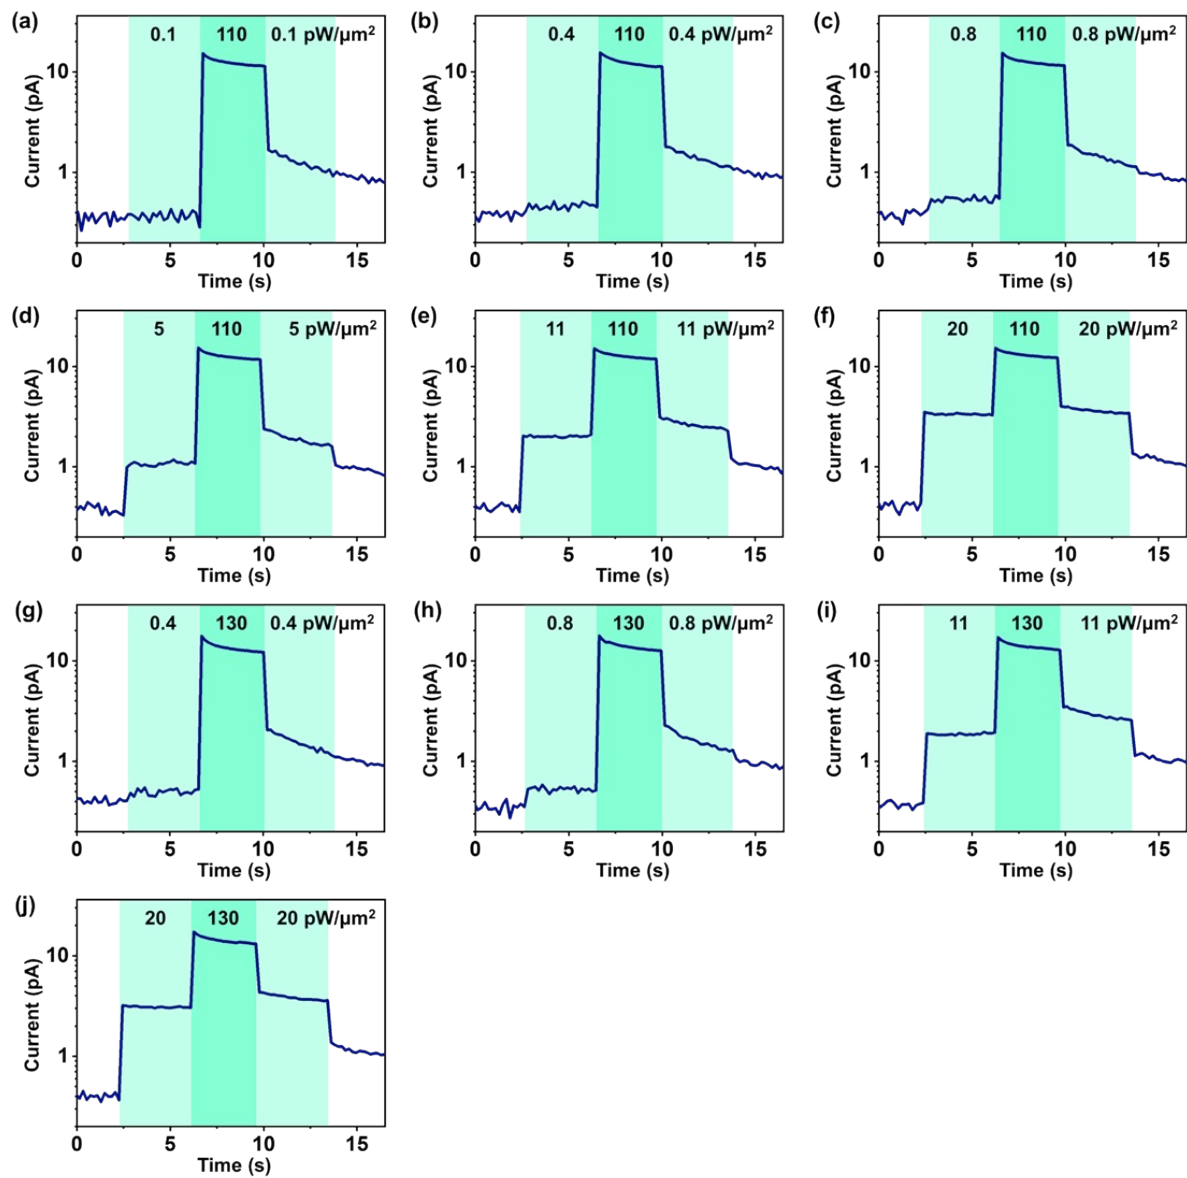

**Fig. S7.** Photocurrent response of the device under different read voltages of (a) 0.2 V, (b)  $-0.1$  V, and (c)  $-0.2$  V. Light color, green; pulse width, 3.6 s; light intensity, 0.5 to 11  $\text{pW}/\mu\text{m}^2$ .

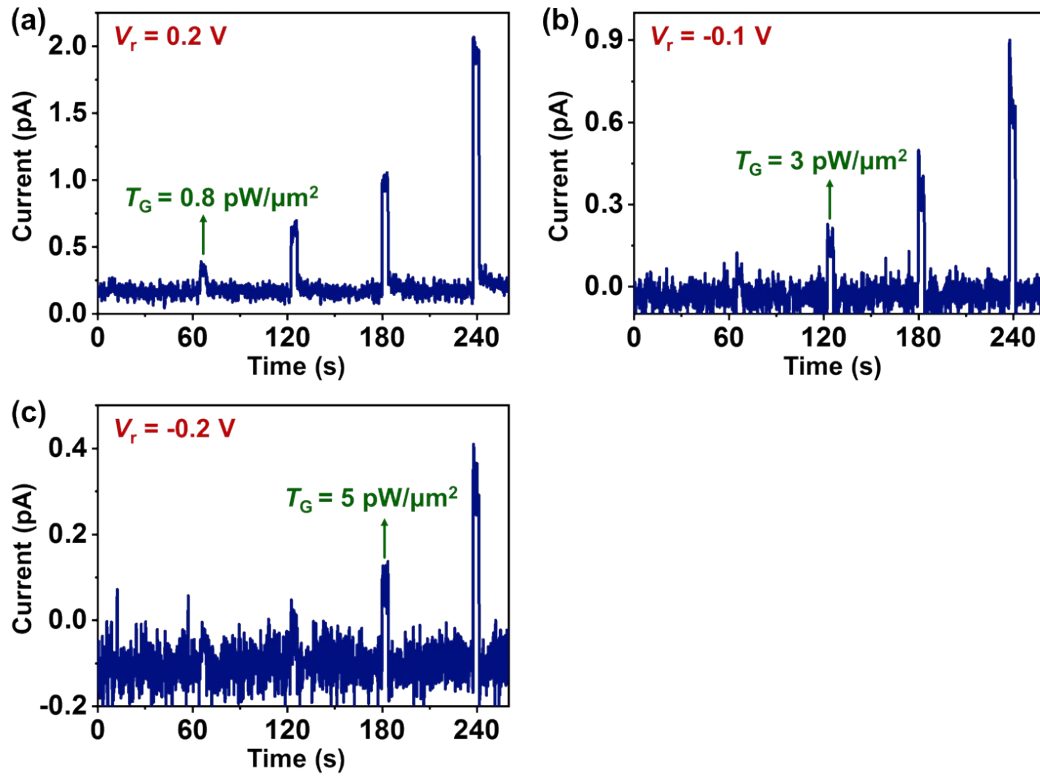

Supplement: d0nr07297d1.pdf [file d0nr07297d1.pdf]
